# Supplementary material for: Psychopathological Symptoms and Well-Being in Overweight and Underweight Adolescents: A Network Analysis
Source: MDPI journal article supplement (doi:10.3390/nu13114096), 2021-11-16
Supplement: s1 [file s1]

**Table S1.** Standardized centrality indices of the EBIC graphical LASSO network for the overweight and underweight subsamples.

| Variable | Overweight sample |           |          | Underweight sample |           |          |
|----------|-------------------|-----------|----------|--------------------|-----------|----------|
|          | Betweenness       | Closeness | Strength | Betweenness        | Closeness | Strength |
| SW       | 0.181             | 0.626     | 0.168    | 0.726              | 1.094     | 0.422    |
| SOM      | -0.715            | -0.730    | -0.383   | -0.133             | -0.115    | -0.163   |
| ANX_DEP  | 2.721             | 2.275     | 2.764    | 2.157              | 1.475     | 2.465    |
| SP       | 0.032             | 0.178     | 0.361    | 1.012              | 0.979     | -0.013   |
| THOUGHT  | -0.715            | -0.212    | -1.193   | -0.991             | -0.659    | -0.843   |
| ATT      | 1.526             | 1.758     | 1.135    | 1.298              | 1.285     | 1.181    |
| DISS     | -0.416            | -0.469    | 0.136    | -0.562             | -0.463    | 0.209    |
| AGG      | 0.480             | 0.153     | 0.047    | -0.419             | -0.233    | -0.002   |
| SCOFF    | -0.566            | -0.786    | -0.875   | -0.991             | -1.031    | -0.719   |
| SELF     | -0.416            | -0.258    | -0.582   | 0.583              | 0.584     | 0.219    |
| PARENT   | -0.267            | -0.242    | -0.026   | -0.562             | -0.198    | -0.223   |
| PEERS    | -0.864            | -1.540    | -0.889   | -0.991             | -1.751    | -0.944   |
| SCHOOL   | -0.416            | -0.595    | -0.010   | -0.133             | 0.332     | 0.155    |
| ACCEPT   | -0.566            | -0.157    | -0.653   | -0.991             | -1.297    | -1.744   |

Variable Abbreviations: ACCEPT Social Acceptance, AGG Aggressive Behavior, ANX\_DEP Anxious Depressed, ATT Attention Problems, DISS Dissocial Behavior, PARENT Parent Relation & Home Life, PEERS Social Support & Peers, SCHOOL School Environment, SCOFF SCOFF Score, SELF Self Perception, SOM Somatic Complaints, SP Social problems, SW Social Withdrawn, THOUGHT Thought Problems.

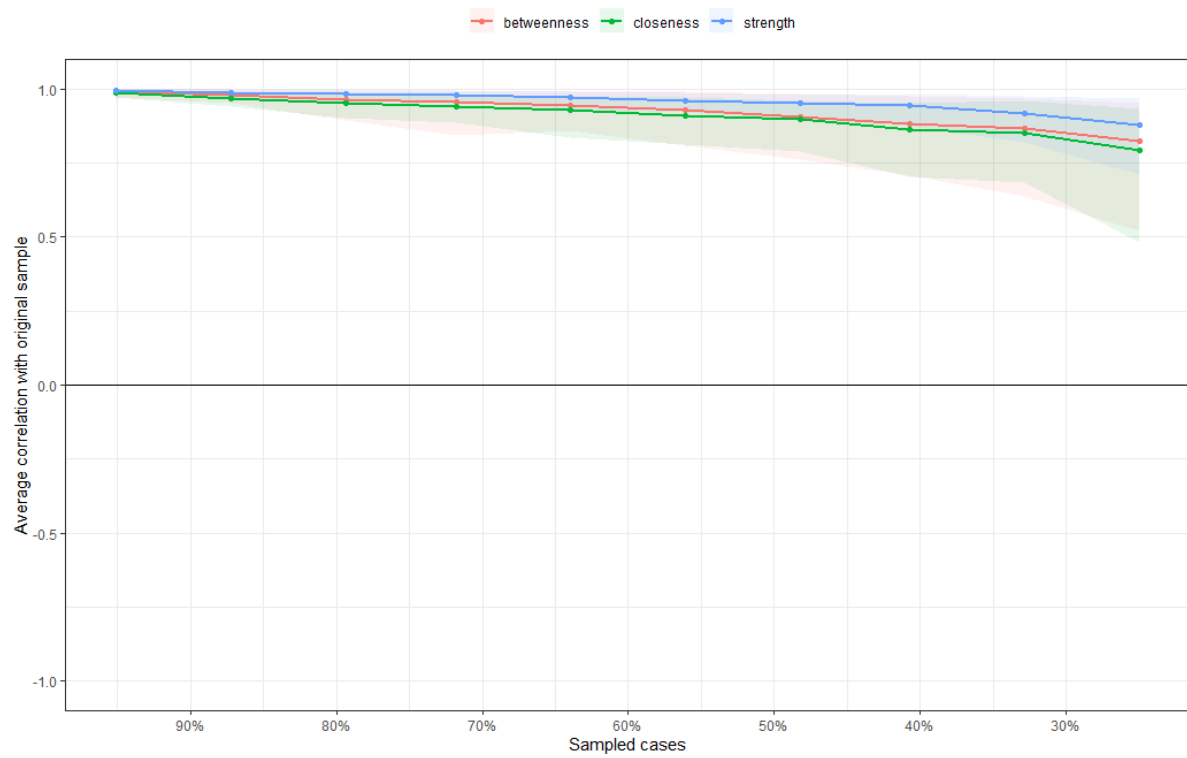

**Figure S1.** Correlation stability plot measuring the stability of betweenness, closeness and strength indices in the overweight subsample.

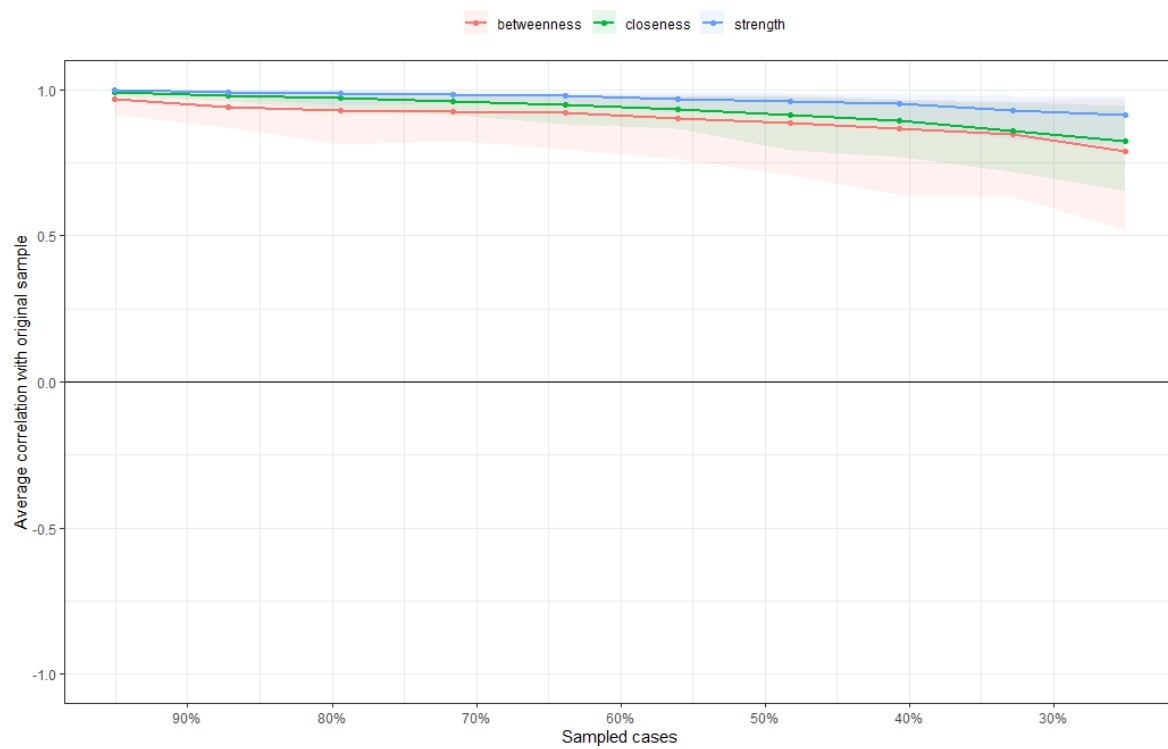

**Figure S2.** Correlation stability plot measuring the stability of betweenness, closeness and strength indices in the underweight subsample.

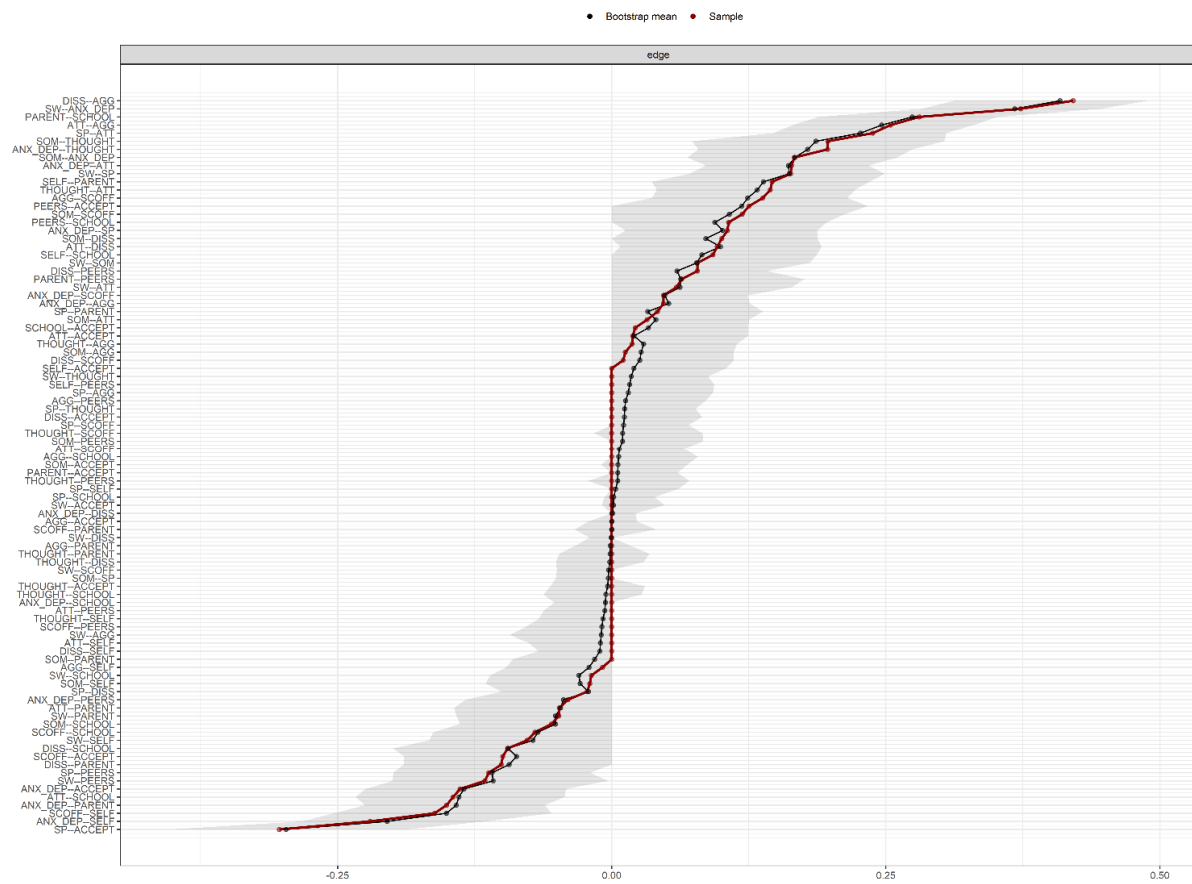

**Figure S3.** Edge accuracy plot depicting 95% confidence obtained from 1.000 bootstrap samples drawn from the population overweight adolescents.



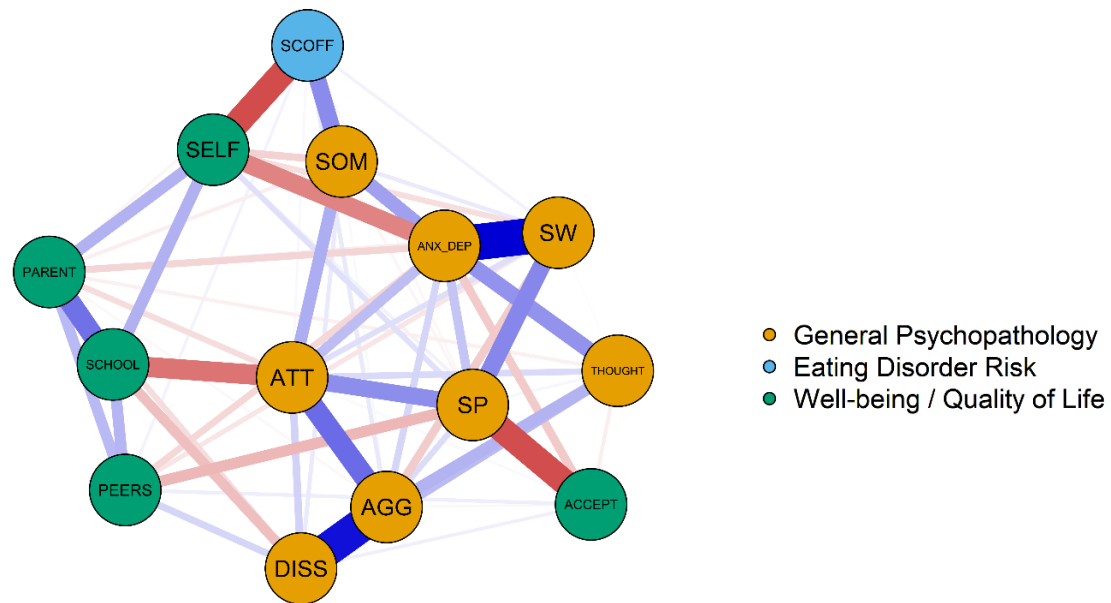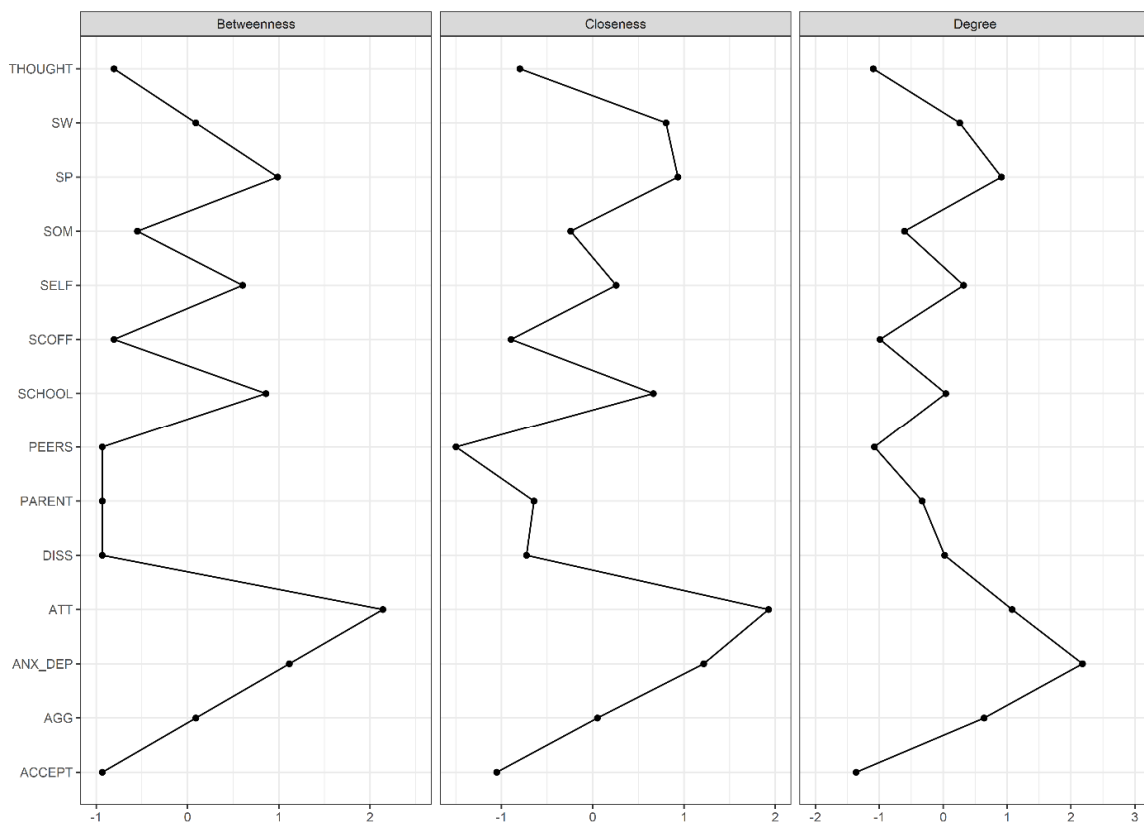

Variable Abbreviations: ACCEPT Social Acceptance, AGG Aggressive Behavior, ANX\_DEP Anxious Depressed, ATT Attention Problems, DISS Dissocial Behavior, PARENT Parent Relation & Home Life, PEERS Social Support & Peers, SCHOOL School Environment, SCOFF SCOFF Score, SELF Self Perception, SOM Somatic Complaints, SP Social problems, SW Social Withdrawn, THOUGHT Thought Problems.

**Figure S5.** Network plot and centrality indices plot for adolescents with normal weight (25<sup>th</sup> < BMI percentile > 75<sup>th</sup>).
